# Supplementary figures and images for: Possible Options for Utilization of EU Biomass Waste: Pyrolysis Char, Calorific Value and Ash Content
Source: MDPI journal article supplement (doi:10.3390/ma17010226), 2023-12-31

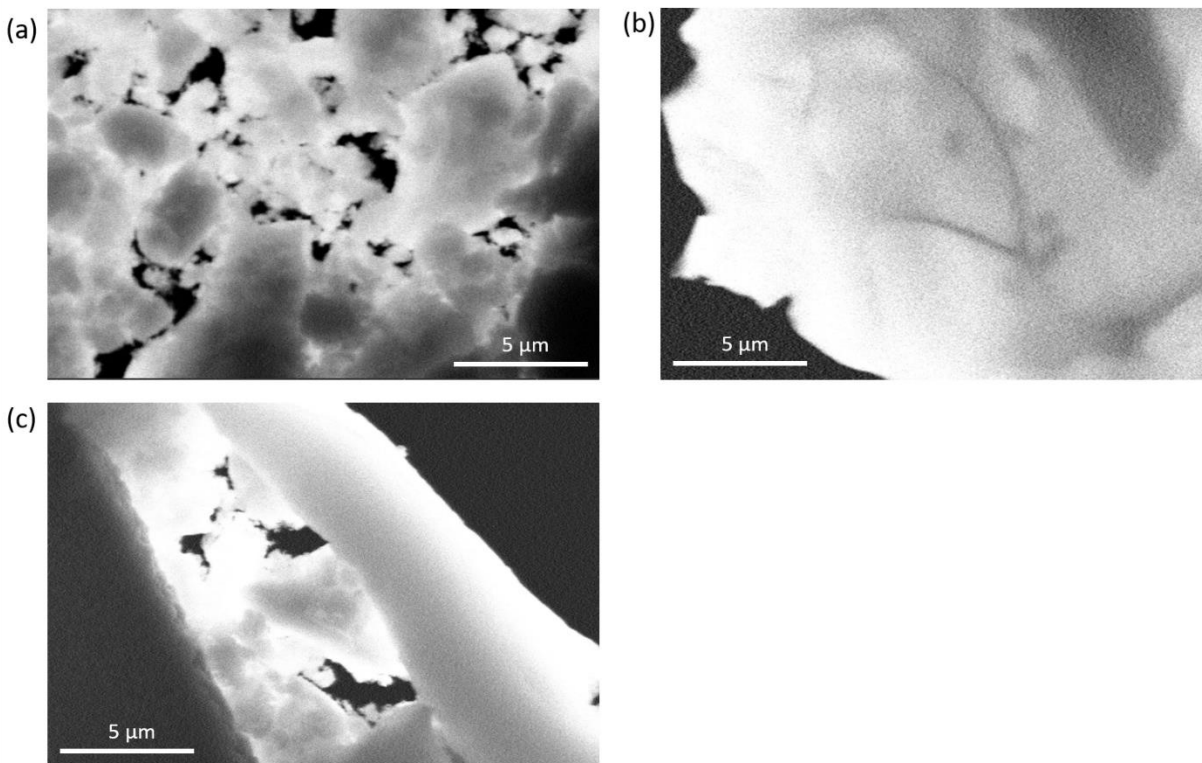

Figure S1: STEM images of biochar derived from: (a) potato peels, (b) oats and (c) willow.

Supplement: s1 [file s1]
